# Supplementary material for: Extracellular serglycin upregulates the CD44 receptor in an autocrine manner to maintain self-renewal in nasopharyngeal carcinoma cells by reciprocally activating the MAPK/β-catenin axis
Source: PubMed Central journal article supplement (PMC5260886; doi:10.1038/cddis.2016.287), 2016-11-03

# Supplemental Materials

Figure S1

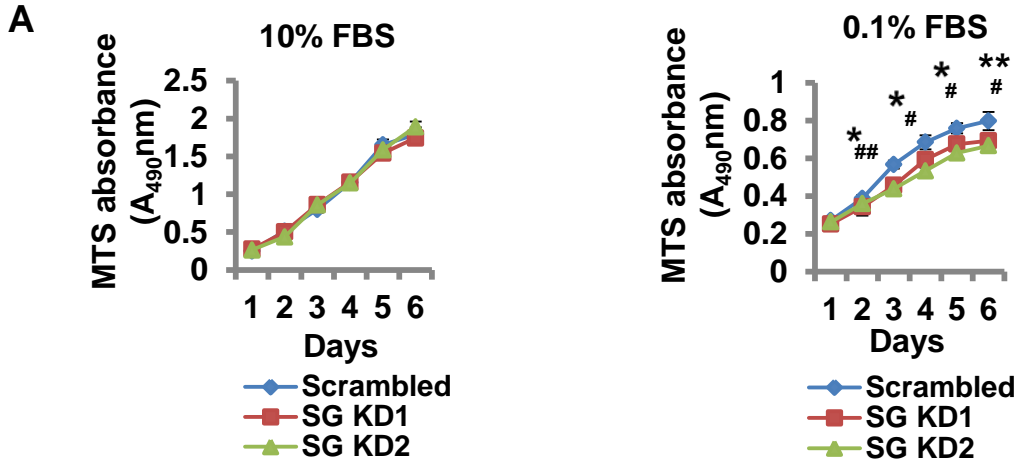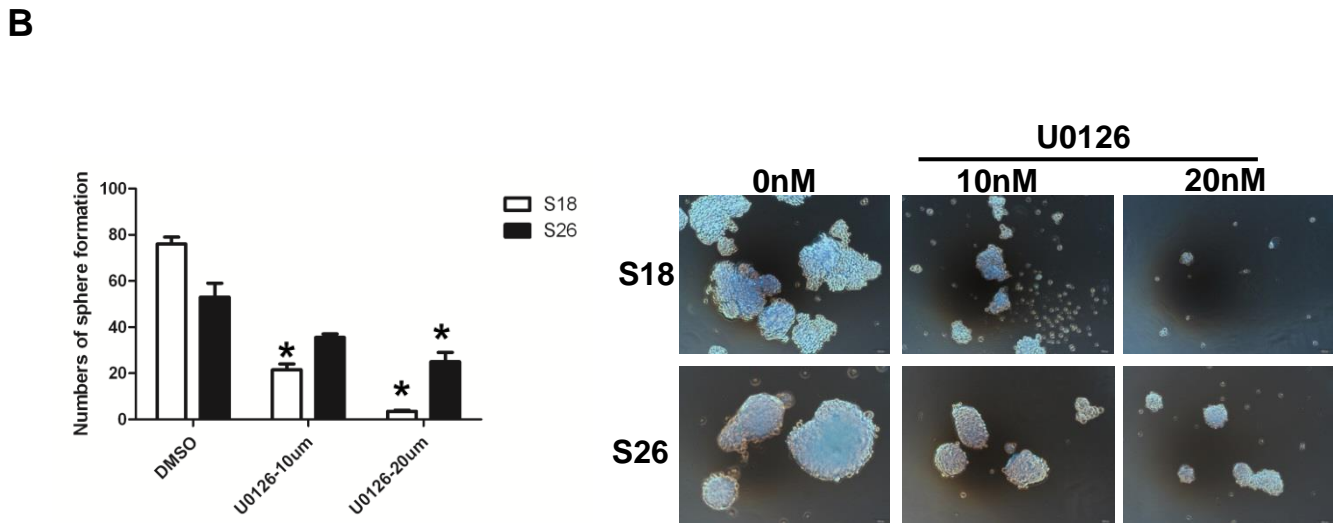

Figure S2

A

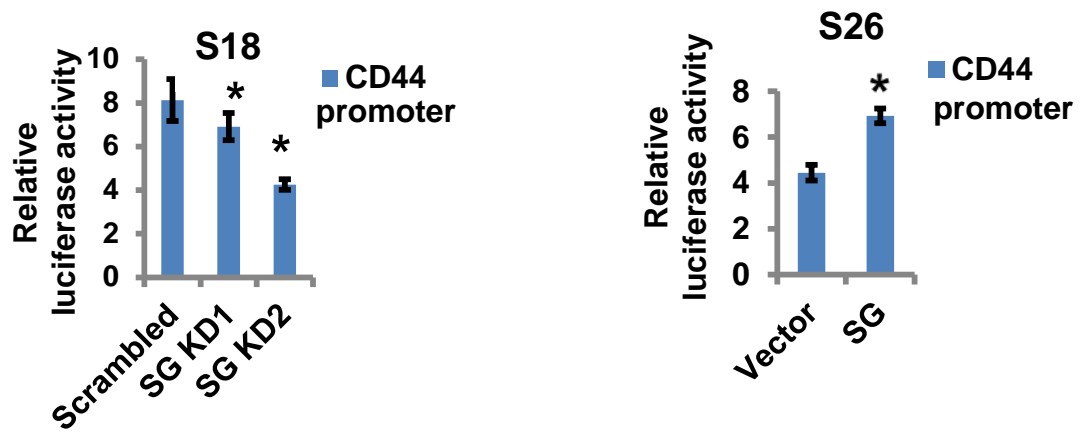

B

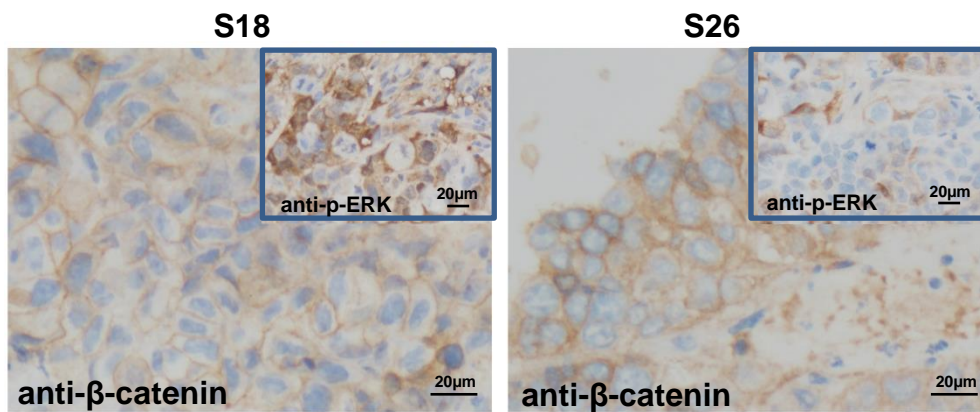

**Table S1**

| Gene      | Forward primer5'-3'       | Reverse primer5' -3'       |
|-----------|---------------------------|----------------------------|
| GAPDH     | AAGGTCATCCCTGAGCTGAA      | TGACAAAGTGGTCGTTGAGG       |
| Oct-4     | CTTGCTGCAGAAGTGGGTGGAGGAA | CTGCAGTGTGGGTTTCGGGCA      |
| Bmi1      | TGGAGAAGGAATGGTCCACTTC    | GTGAGGAAACTGTGGATGAGGA     |
| Nanog     | AATACCTCAGCCTCCAGCAGATG   | TGCGTCACACCATTGCTATTCTTC   |
| Sox2      | AAATGGGAGGGGTGCAAAAGAGGAG | CAGCTGTCATTGCTGTGGGTGATG   |
| ABCG2     | TCATCAGCCTCGATATTCCATCT   | GGCCCGTGGAACATAAGTCTT      |
| CD44      | TCCATCAAAGGCATTGGGCAG     | AACCTGCCGCTTTGCAGGTGT      |
| Serglycin | TATCCTACGCGGAGAGCCAGGTAC  | TTCCGTTAGGAAGCCACTCCCAGATC |
| C-Myc     | CGTCTCC ACACATCAGCACAA    | TCTTGGCAGCAGGATAGTCCTT     |
| CyclinD1  | TATTGCGCTGCTACCGTTGA      | CCAATAGCAGCAAACAATGTGAAA   |

# Figure S3

## CD44 promoter sequence :

```
aaataaactgctgtttgattccaacattaaaccatagtatattatagatagatatagagttatcattcaaagtatga  
tattcaatctcaaaaggctcccctgaagaatattcaaactcttctctctttaagatctgctgggtaggaaagatgg  
gagaaaatgaattaatgtttacacagaaaggaggataatgggggcaaaaataatagatgaacgtatgggtggatgagaga  
atggataaaatgataggtggatatgttgatcttgacagatgggaaatgagtgatatatcaataacagatatgtgggt  
ggatgggtggagaagaggatgggtggatgggtgtggtttatgaagagatgtgaaaaaggaagtgtggaatgatggatgag  
aagtgtatgggaagatgaatagaagaataggtggtgaataaattaaaagggtgtggttggatgaatgaatgagtggg  
atgatagatggacctaagtgggttagtgatggacaggaggatggatggatgtgagagcccagaaggacataaggaaaga  
tgggtggatagatggatgggaggatggaaggatattaggaggatgaatgagcatgtgtgtggagagaggtgccattca  
cactggcttgaacacatgggttagctgagccaaatgccagcctatgacaggccatcagtagcttccctgagctgttct  
gccaaagactaaaattcattcaagccatgtggactgttattgaggggaaaaagaatgagctctccctcttccactg  
gaagattcaccaactccccaccctcactcccactgtgggcacggaggcactgcgccaccagggaagacactgcacct  
ctctccagctctctcccaggatatccaacatcctgtgaaaccagagatcttgctccagccgattcagagaaatttag  
cgggaaaggagaggccaaaggctgaaccaatggtgcaaggtttacgggtcgggtcatcctctgtcctgacgcccgggg  
ccagcgggagaaagccagtcgtctctggcgaggggccagtggggctcggaggcacaggcaccgccgacactccagg  
ttccccgaccacgtccctggcagccccgattattacagcctcagcagagcacggggcgggggagagggggcccgc  
ccgggagggtgctactcttaaaactctgcccgtgcttagtcacagcccccttgcttgggtgtccttcgctcgc  
tcctcctcgtcttaggtcactgtttcaacctc
```

## Vector Information

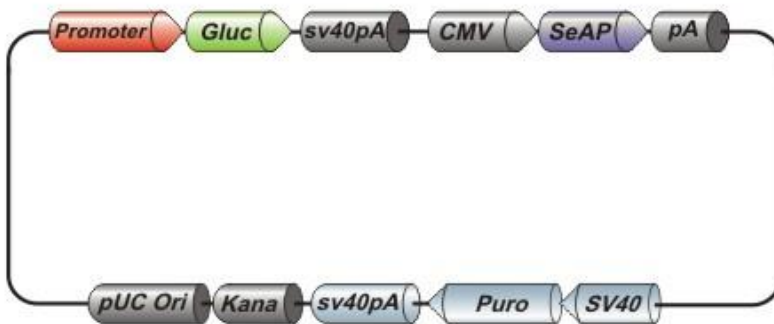

Supplement: cddis2016287x1.pdf [file cddis2016287x1.pdf]
